# Supplementary material for: Cannabidiol at Nanomolar Concentrations Negatively Affects Signaling through the Adenosine A2A Receptor
Source: MDPI journal article supplement (doi:10.3390/ijms242417500), 2023-12-15
Supplement: s1 [file s1]

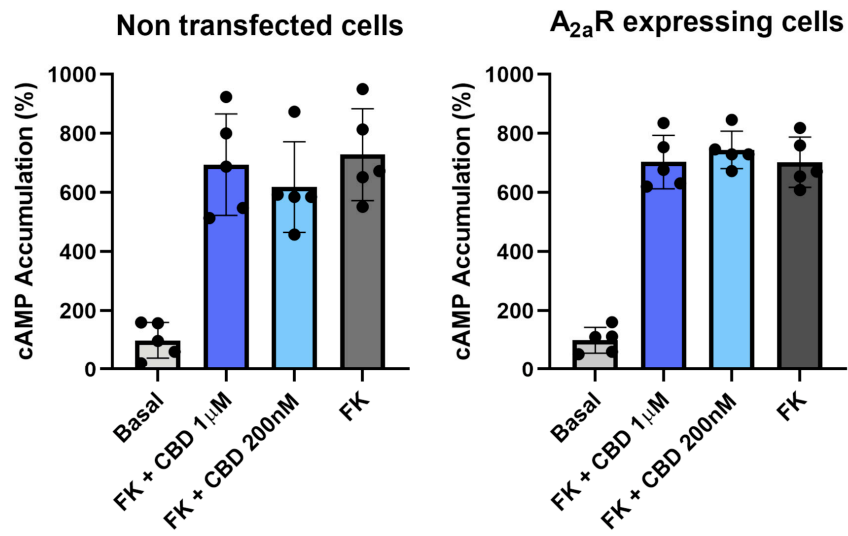

**Supplementary Figure S1.** Determination of cAMP levels in CHO cells treated with forskolin. Untransfected cells (panel A) or A<sub>2a</sub>R-expressing cells (panel B) were treated with 500 nM forskolin (FK) and with either cAMP<sub>i</sub>medium or CBD at two concentrations (200 nM and 1  $\mu$ M; prepared in cAMP<sub>i</sub>medium). A representative experiment is shown in which the data are expressed as a percentage  $\pm$  SD of the effect of 500 nM forskolin compared with the basal condition (100%). Data points from a representative experiment. In three different experiments and after statistical analysis using a one-way ANOVA followed by Bonferroni's post-hoc multiple comparison tests (versus forskolin-FK condition), no significant differences were found due to the presence of CBD.
